# Supplementary material
Source: PubMed Central journal article supplement (PMC10039706)
Supplement: NIHMS1879371-supplement-1.pdf [file NIHMS1879371-supplement-1.pdf]

1 **Supplementary Table 1. Baseline demographic and laboratory data of the study**  
 2 **population. Related to Figure 1.**

|                                | <b>Non-alcoholic controls<br/>(n=33)</b> | <b>Patients with alcohol<br/>use disorder and liver<br/>disease (n=36)</b> |
|--------------------------------|------------------------------------------|----------------------------------------------------------------------------|
| Gender (male), n (%)           | 15 (45.5)                                | 19 (52.8)                                                                  |
| Age (years), n=69              | 34.0 (16.0)                              | 50.0 (16.3)                                                                |
| BMI (kg/m <sup>2</sup> ), n=60 | 22.0 (2.5)                               | 24.9 (6.9)                                                                 |
| AST (IU/L), n=36               |                                          | 49.5 (56.5)                                                                |
| ALT (IU/L), n=36               |                                          | 37.0 (31.3)                                                                |
| GGT (IU/L), n=36               |                                          | 68.5 (146.3)                                                               |
| AP (IU/L), n=36                |                                          | 78.0 (44.3)                                                                |
| Bilirubin (mg/dL), n=36        |                                          | 0.4 (0.4)                                                                  |
| Albumin (g/dL), n=36           |                                          | 4.5 (0.3)                                                                  |
| INR, n=35                      |                                          | 1.0 (0.1)                                                                  |
| Creatinine (mg/dL), n=36       |                                          | 0.70 (0.20)                                                                |
| CAP (dB/m), n=36               |                                          | 276.5 (83.3)                                                               |
| Stiffness (kPa), n=36          |                                          | 5.95 (2.33)                                                                |
| Fibrosis stages F2-F4, n (%)   |                                          | 7 (19.4)                                                                   |

3 Values are presented as median and interquartile range in parentheses. The number of subjects  
 4 for which data were available is indicated in the first column. ALT, alanine aminotransferase; AP,  
 5 alkaline phosphatase; AST, aspartate aminotransferase; BMI, body mass index; CAP, controlled  
 6 attenuation parameter; GGT, gamma-glutamyltransferase; INR, international normalized ratio.

7

8

9 **Supplementary Table 2. Baseline demographic and laboratory data of 2 patients**  
 10 **with liver biopsy. Related to Figure 1.**

|                              | <b>Alcohol-associated liver disease (n=2)</b> |
|------------------------------|-----------------------------------------------|
| Gender (male), n (%)         | 1 (50.0)                                      |
| Age (years)                  | 49 (4.0)                                      |
| BMI (kg/m <sup>2</sup> )     | 28.2 (0.5)                                    |
| AST (IU/L)                   | 90.5 (64.5)                                   |
| ALT (IU/L)                   | 125.0 (90.0)                                  |
| GGT (IU/L)                   | 305.5 (234.5)                                 |
| AP (IU/L)                    | 86.5 (7.5)                                    |
| Bilirubin (mg/dL)            | 0.8 (0.3)                                     |
| Albumin (g/dL)               | 4.8 (0.1)                                     |
| INR                          | 1.0 (0.0)                                     |
| Creatinine (mg/dL)           | 0.78 (0.04)                                   |
| CAP (dB/m)                   | 331.5 (21.5)                                  |
| Stiffness (kPa)              | 8.75 (0.55)                                   |
| Fibrosis stages F2-F4, n (%) | 2 (100.0)                                     |

11 Values are presented as median and interquartile range in parentheses. ALT, alanine  
 12 aminotransferase; AP, alkaline phosphatase; AST, aspartate aminotransferase; BMI, body mass  
 13 index; CAP, controlled attenuation parameter; GGT, gamma-glutamyltransferase; INR,  
 14 international normalized ratio.

15

16 **Supplementary Table 3. Quantitative PCR primers used in this study. Related to**  
 17 **Figure 3, 4, 5, 6, 7.**

| Gene                | Application | Sequence                                                                                         |
|---------------------|-------------|--------------------------------------------------------------------------------------------------|
| Mouse <i>Adh1</i>   | qRT-PCR     | F: 5'-GGGTTCTCAACTGGCTATGG-3'<br>R: 5'-ACAGACAGACCGACACCTCC-3'                                   |
| Mouse <i>Cyp2e1</i> | qRT-PCR     | F: 5'-CTTAGGGAAAACCTCCGCAC-3'<br>R: 5'-GGGACATTCCTGTGTTCCAG-3'<br>F: 5'-GGTCAAAGGTTTGGGAAGCAG-3' |
| Mouse <i>I1b</i>    | qRT-PCR     | R: 5'-TGTGAAATGCCACCTTTTGA-3'<br>F: 5'-GGATGTACAGATGGGGGATG-3'                                   |
| Mouse F4/80         | qRT-PCR     | R: 5'-CATAAGCTGGGCAAGTGGTA-3'<br>F: 5'-AGTCCCTGCCCTTTGTACACA-3'                                  |
| Mouse 18S           | qRT-PCR     | R: 5'-CGATCCGAGGGCCTCACTA-3'<br>F: 5'-TGCACCCAAACCGAAGTC-3'                                      |
| Mouse <i>Cxcl1</i>  | qRT-PCR     | R: 5'-GTCAGAAGCCAGCGTTCACC-3'<br>F: 5'-AAAGTTTGCCTTGACCCTGAA-3'                                  |
| Mouse <i>Cxcl2</i>  | qRT-PCR     | R: 5'-CTCAGACAGCGAGGCACATC-3'<br>F: 5'-ATTGGGATCATCTTGCTGGT-3'                                   |
| Mouse <i>Ccl2</i>   | qRT-PCR     | R: 5'-CCTGCTGTTCACAGTTGCC-3'<br>F: 5'-AGGGTCTGGGCCATAGAACT-3'                                    |
| Mouse <i>Tnfa</i>   | qRT-PCR     | R: 5'-CCACCACGCTCTTCTGTCTAC-3'<br>F: 5'-GGRAAACTCACCAGGTCCAG-3'                                  |
| Fungal 18S rRNA     | qRT-PCR     | R: 5'-GSWCTATCCCCAKCACGA-3'                                                                      |

*Candida* spp.<sup>1</sup>

qRT-PCR

F: 5'-CAACGGATCTCTTGGTTCTC-3'

R: 5'-CGGGTAGTCCTACCTGATTT-3'

---

19 **Supplementary Figure Legends**

20 **Figure S1. *C. albicans*-reactive Th17 cells migrate to and are present in the liver of**  
21 **patients with alcohol use disorder and liver disease. Related to Fig. 1.**

22 (A) Gating strategies of fungus-reactive CD154<sup>+</sup>CD45RA-memory CD4<sup>+</sup> T cells and  
23 cytokine production upon enrichment by ARTE. (B) Scatterplot demonstrating Pearson  
24 correlation between the percentage of *C. albicans*-reactive Th17 cells and liver stiffness  
25 (in kPa) in patients with alcohol use disorder and liver disease (n=36). (C) Study design  
26 for single-cell RNA and TCR sequencing of *C. albicans*-stimulated T cells from PBMCs,  
27 as well as bulk TCR sequencing from liver biopsies and peripheral CD4<sup>+</sup> T cells. *C.*  
28 *albicans*-stimulated T cells were magnetically isolated based on dual expression of  
29 CD154 and CD69 (ARTE) from patients with alcohol-associated liver disease after  
30 stimulation with whole *C. albicans* lysates, further purified by FACS sorting, and subjected  
31 to single-cell RNA and TCR sequencing. Single-cell RNA sequencing combined with TCR  
32 sequencing provides the transcriptomic description and clonal composition of *C. albicans*-  
33 stimulated T cells. For bulk TCR sequencing, RNA is extracted from liver biopsies and  
34 total CD4<sup>+</sup> T cells from blood of the same individuals as the single-cell RNA and TCR  
35 sequencing. Bulk TCR sequences of liver biopsies and peripheral CD4<sup>+</sup> T cells were  
36 compared with the *C. albicans*-stimulated single-cell TCR sequences to identify shared  
37 clonotypes. Created with Biorender.com.

38

39 **Figure S2. *C. albicans*-activated Th17 cells in mice on a control diet and migration**  
40 **from mesenteric lymph nodes to liver. Related to Fig. 2**

41 (A-D) C57BL/6 mice were fed chronic plus binge ethanol diet (ethanol) or isocaloric diet  
42 (control). Fungus-activated Th17 cells in mesenteric lymph nodes, portal vein blood, and  
43 liver were detected after isolation of mononuclear cells, following 6 hrs *ex vivo* stimulation  
44 with *C. albicans* or *S. cerevisiae* lysate. (A) Flow cytometry plots of IL17A<sup>+</sup>CD154<sup>+</sup> cells  
45 among CD4<sup>+</sup> T cells from mice fed a control diet. Gating strategies of fungus-activated  
46 Th17 cells in mesenteric lymph nodes (B), portal vein blood (C), and liver (D). (E-F) Kaede  
47 mice were fed a chronic plus binge ethanol diet (ethanol) or isocaloric diet (control).  
48 Fungus-activated Th17 cells in liver were detected after isolation of mononuclear cells,  
49 following 6 hrs *ex vivo* stimulation with *C. albicans* or *S. cerevisiae* lysate. (E) Flow

50 cytometry plots of photoconverted and migrated (Kaede red) cells from hepatic  
 51 mononuclear cells. (F) Gating strategies for fungus-activated Th17 cells in  
 52 photoconverted (Kaede red) cells.

53

54 **Figure S3. Nystatin does not induce hepatic inflammatory cytokines and does not**  
 55 **significantly affect the composition of the bacterial microbiota. Related to Fig. 3.**

56 C57BL/6 mice were placed on a chronic Lieber DeCarli diet or control diet for 8 weeks.  
 57 Diets were supplemented with or without nystatin for the last 10 days. (A) Hepatic levels  
 58 of *Il1b*, *Cxcl1*, *Cxcl2*, *Tnfa* and *Ccl2* mRNA in mice fed a control diet. Figure S3A was  
 59 conducted in 2 independent experiments. Results are expressed as mean±SEM. Fold  
 60 change was calculated relative to vehicle-treated mice on control diet. (B-C) 16S rRNA  
 61 sequencing of cecum samples was performed. Principal Coordinates Analysis (PCoA)  
 62 was used to show beta diversity between the groups based on the abundance of 66  
 63 bacterial at the genus level. (D) Relative abundances of top 10 genera are shown.

64

65 **Figure S4. *Candida*-specific TCR transgenic mice develop more severe ethanol-**  
 66 **induced liver disease. Related to Fig. 4 and 5.**

67 (A) Gating strategies for *Candida*-specific Th17 cells in *Rag1<sup>-/-</sup>/CaTCRtg* mice. (B) Gating  
 68 strategies for *Rag1<sup>-/-</sup>* mice. (C) Timeline of adoptive transfer experiments of *ex vivo* *C.*  
 69 *albicans*-primed T cells from *Candida*-specific TCR transgenic mice (*Rag1<sup>-/-</sup>/CaTCRtg*) or  
 70 non-transgenic control mice into wild-type mice. (D) Gating strategies for Thy1.1<sup>+</sup> CD4<sup>+</sup>  
 71 Vα2<sup>+</sup> hector T cells in livers of recipient mice that received *C. albicans*-primed T cells from  
 72 *Rag1<sup>-/-</sup>/CaTCRtg* mice (upper panel) or wild-type C57BL/6 mice (lower panel).

73

74 **Figure S5. *Candida*-specific TCR transgenic hector T cells promote ethanol-**  
 75 **induced liver disease. Related to Fig. 5.**

76 (A) Diagram of adoptive transfer of non-primed *Rag1<sup>-/-</sup>/CaTCRtg* hector T cells to mice.  
 77 CD4<sup>+</sup> T cells from *Candida*-specific TCR transgenic mice (*Rag1<sup>-/-</sup>/CaTCRtg*) and C57BL/6  
 78 donor mice were injected intravenously to C57BL/6 mice (day 13 of chronic plus binge  
 79 ethanol feeding). Created with BioRender.com. (B) Serum levels of ALT. (C) Hepatic  
 80 triglyceride content. (D) Representative oil red O-stained liver sections (scale bar, 100

81  $\mu\text{m}$ ). (E) Hepatic levels of *Il1b* mRNA. (F) Serum levels of ethanol. (G-H) Hepatic levels  
 82 of *Cyp2e1* and *Adh1* mRNAs. Figure S4 E-L was conducted in 2 independent experiments.  
 83 Results are expressed as mean $\pm$ SEM. Fold change was calculated relative to mice that  
 84 adoptively transferred with CD4<sup>+</sup> T cells from C57BL/6 mice. *P* values determined by 2-  
 85 sided Student *t* test. \**P*<0.05.

86

87 **Figure S6. *C. albicans*-primed polyclonal T cells promote ethanol-induced liver**  
 88 **disease in mice. Related to Fig. 6.**

89 (A) Timeline of adoptive transfer experiments of *ex vivo* fungi-primed polyclonal CD4<sup>+</sup> T  
 90 cells to mice. (B) Gating strategies for IL17A-eGFP<sup>+</sup> cells after expansion of fungus-  
 91 primed Th17 cells. (C) Gating strategies for IL17A-eGFP<sup>+</sup> cells detected in livers of  
 92 recipient mice fed ethanol.

93

94 **Figure S7. Bone marrow derived cells mediate the disease exacerbating effect of**  
 95 **adoptively transferred polyclonal *C. albicans*-primed T cells. Related to Fig. 7.**

96 (A) Diagram of adoptive transfer of *C. albicans*-primed polyclonal T cells to *IL17ra*<sup>ΔBM</sup>  
 97 chimeric mice. Wild-type (WT) recipient mice underwent transplantation of wild-type or  
 98 *IL17ra* deficient bone marrow (*IL17ra*<sup>ΔBM</sup>) and fed a chronic plus binge ethanol diet.  
 99 Chimeric mice were injected with *C. albicans*-primed polyclonal T cells three days before  
 100 harvesting. Created with BioRender.com. (B) Serum levels of ALT. (C) Hepatic triglyceride  
 101 content. (D) Representative oil red O-stained liver sections (scale bar, 100  $\mu\text{m}$ ). (E)  
 102 Immunoblot of Il1b in liver samples. (F-G) Hepatic levels of *Cxcl1* and *Cxcl2* mRNAs. (H)  
 103 Serum levels of ethanol. (I-J) Hepatic levels of *Cyp2e1* and *Adh1* mRNAs. (K-Q) *IL17ra*<sup>ΔHep</sup>  
 104 and littermate *IL17ra*<sup>fl/fl</sup> mice were fed a chronic plus binge ethanol diet. *C. albicans*-primed  
 105 polyclonal T cells were injected intravenously 3 days before harvesting. (K) Serum levels  
 106 of ALT. (L) Hepatic triglyceride content. (M) Representative oil red O-stained liver sections  
 107 (scale bar, 100  $\mu\text{m}$ ). (N) Hepatic levels of *Il1b* mRNA. (O) Serum levels of ethanol. (P-Q)  
 108 Hepatic levels of *Cyp2e1* and *Adh1* mRNAs. Figure S7 A-J was conducted in 2  
 109 independent experiments. Figure S7 K-Q was conducted in 2 independent experiments.  
 110 Results are expressed as mean $\pm$ SEM. *P* values determined by 2-sided Student *t* test.  
 111 \**P*<0.05.

## Supplementary Figure 1

A

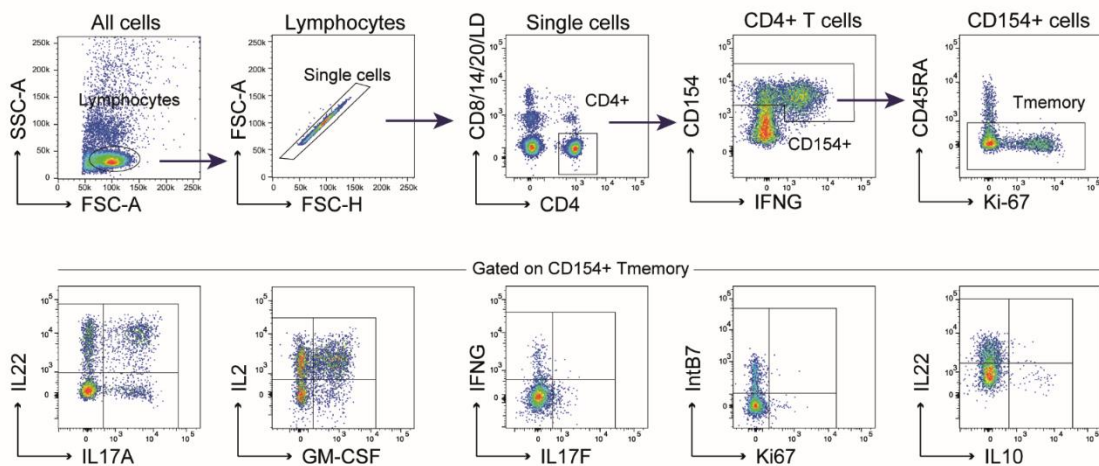

B

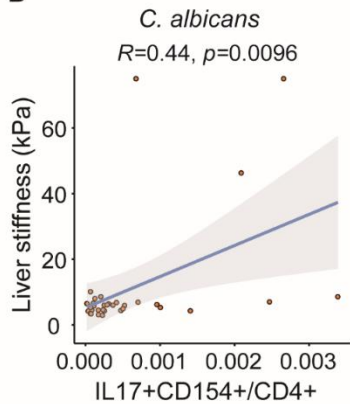

C

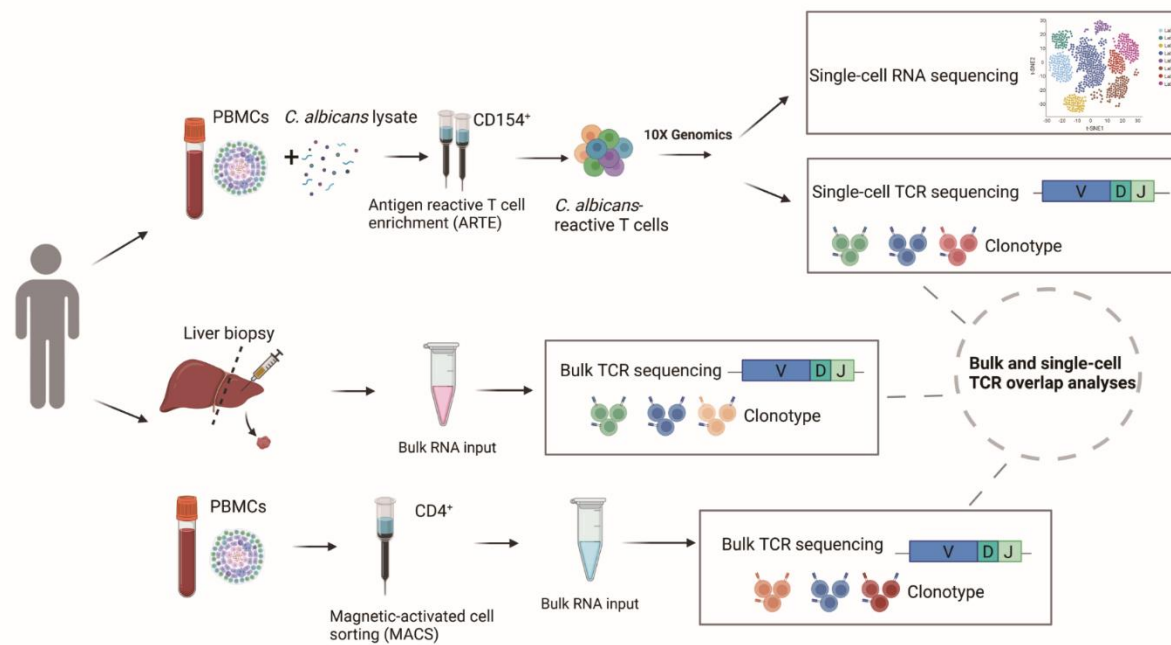



## Supplementary Figure 2

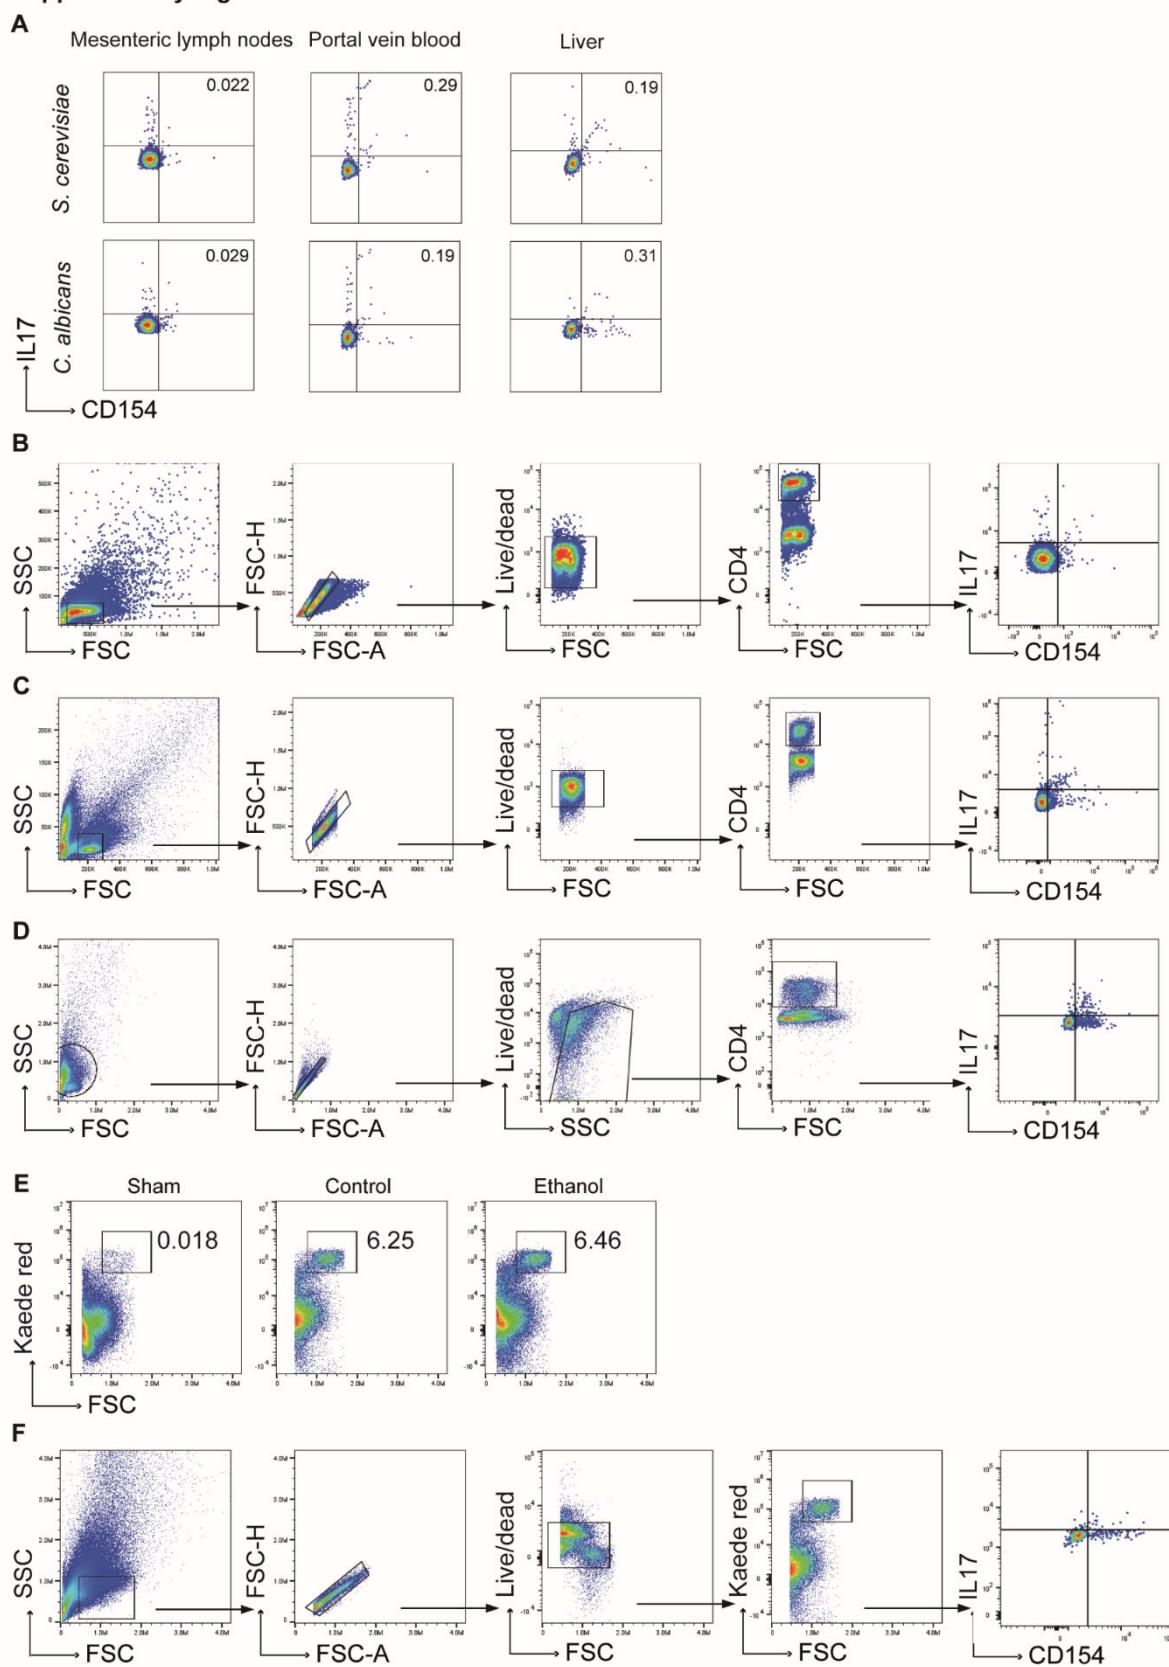

## Supplementary Figure 3

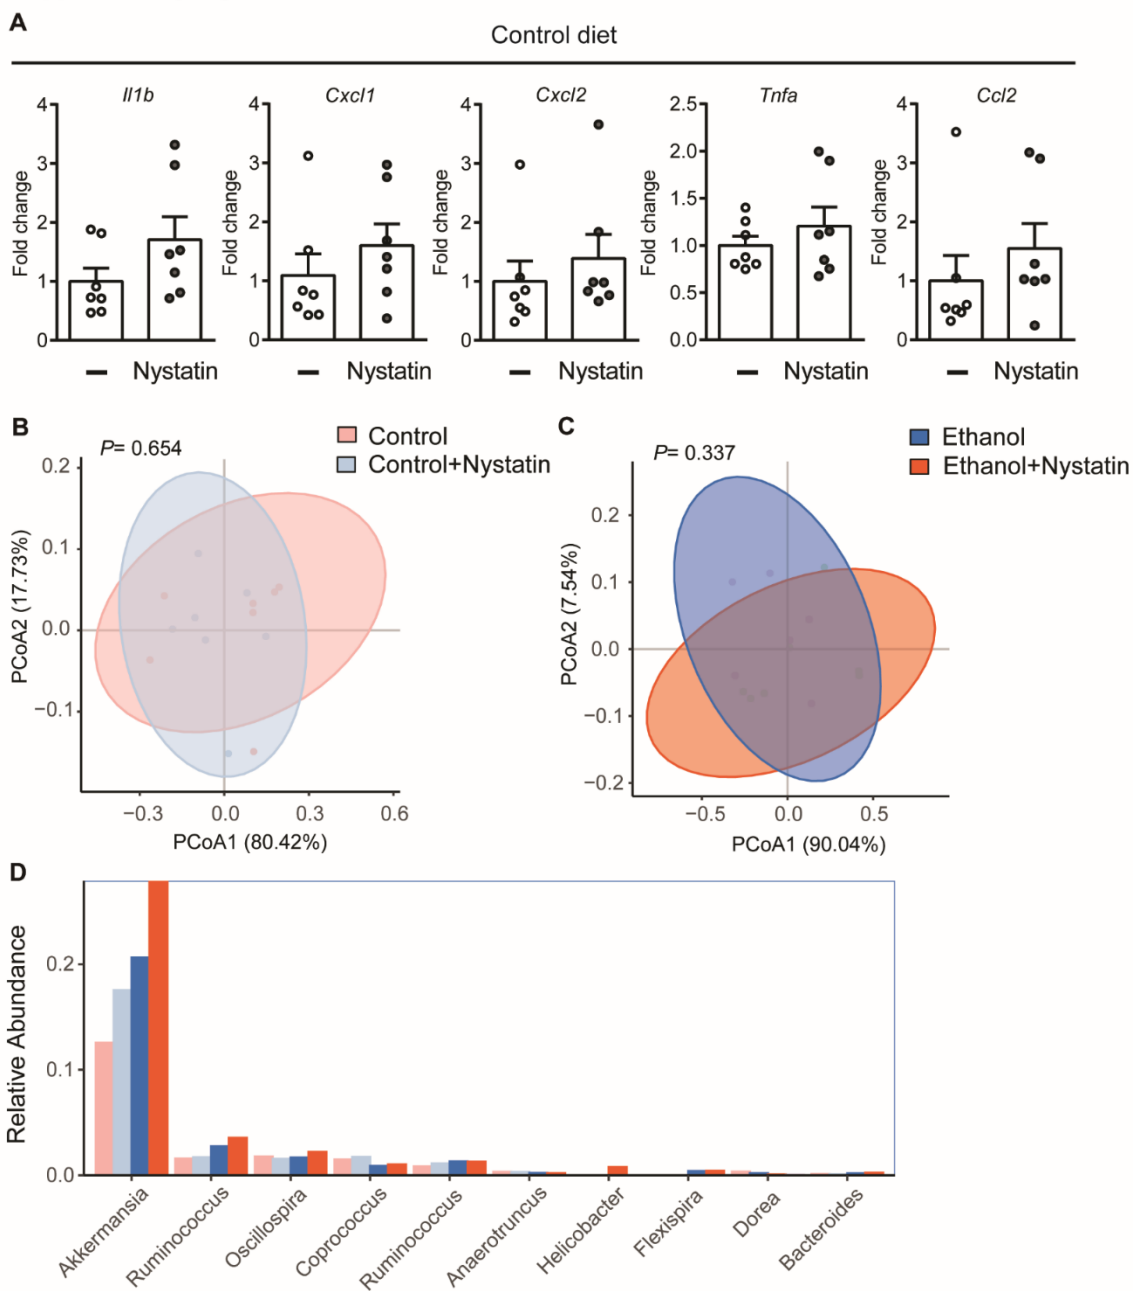

## Supplementary Figure 4

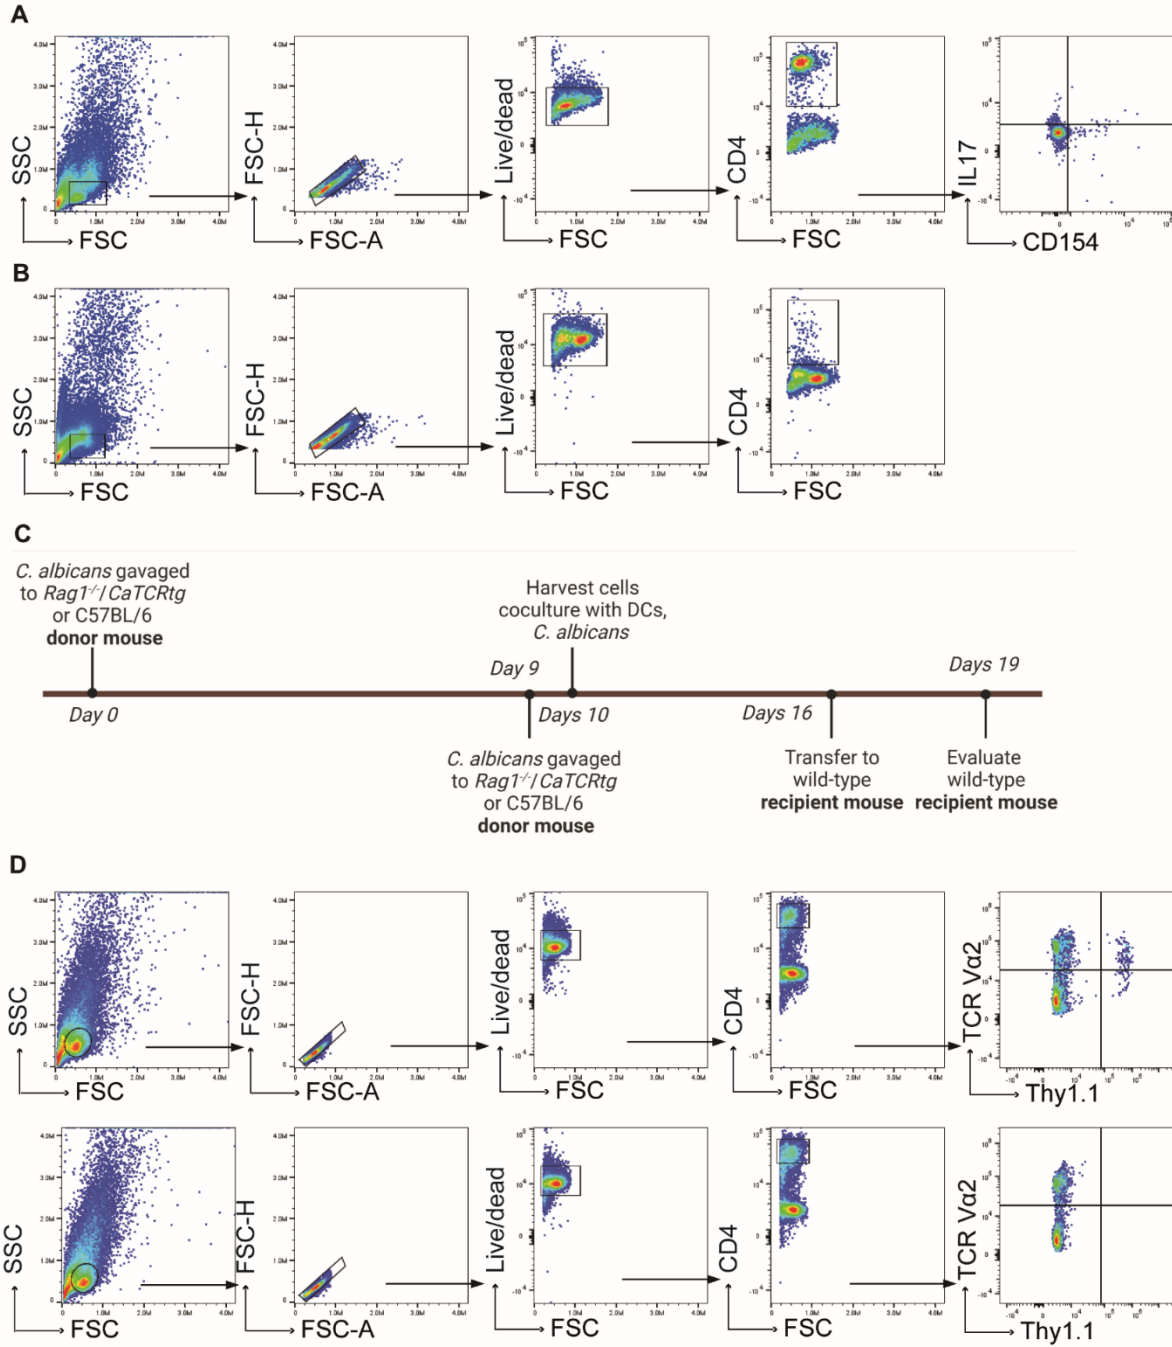

## Supplementary Figure 5

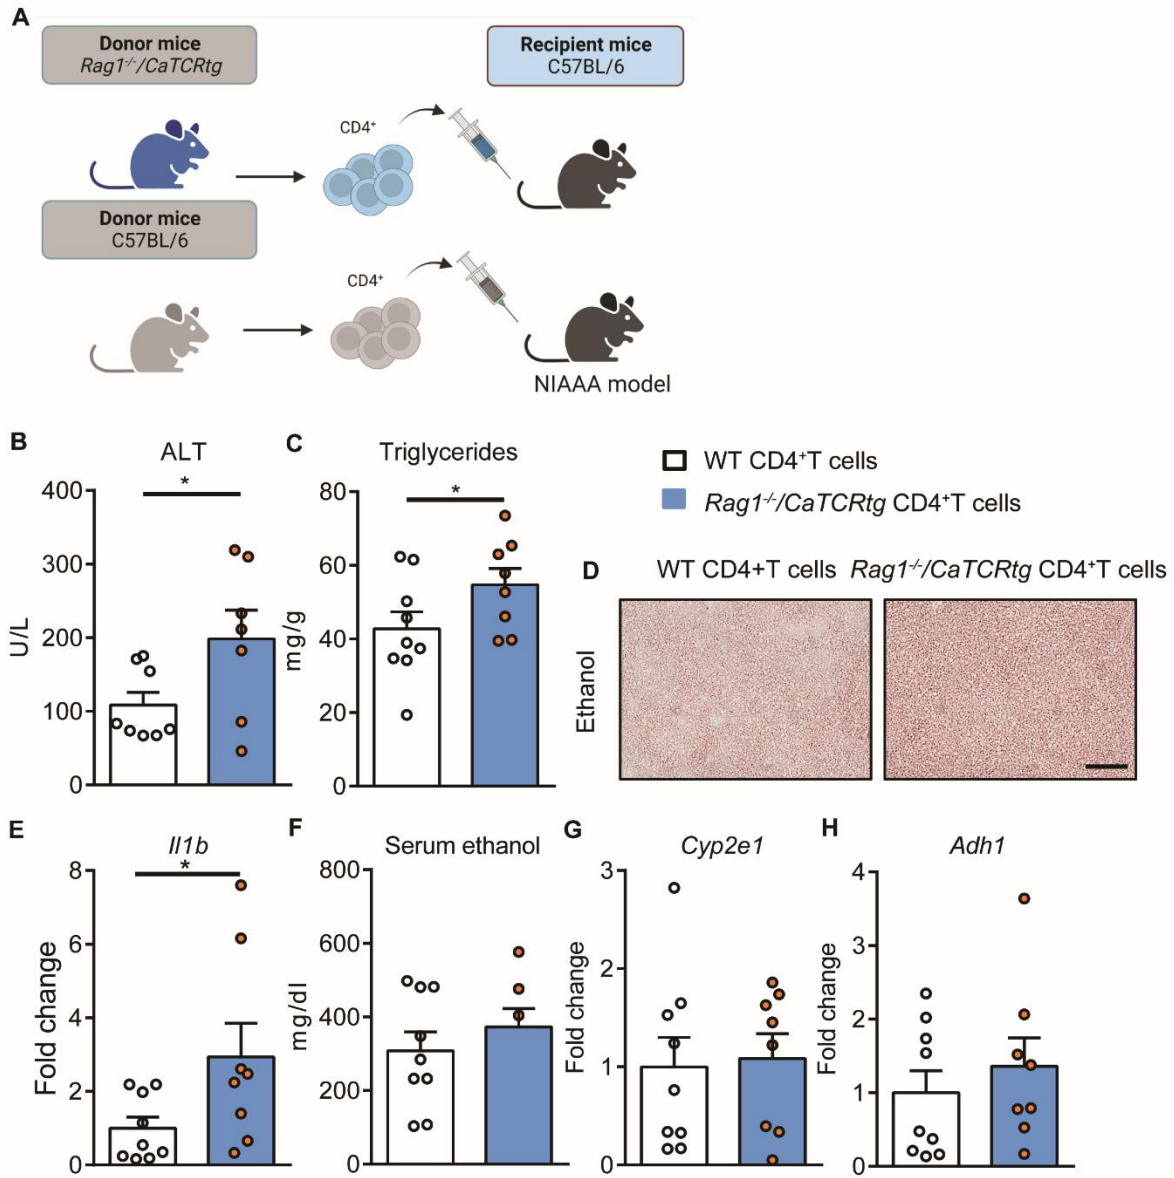

## Supplementary Figure 6

A

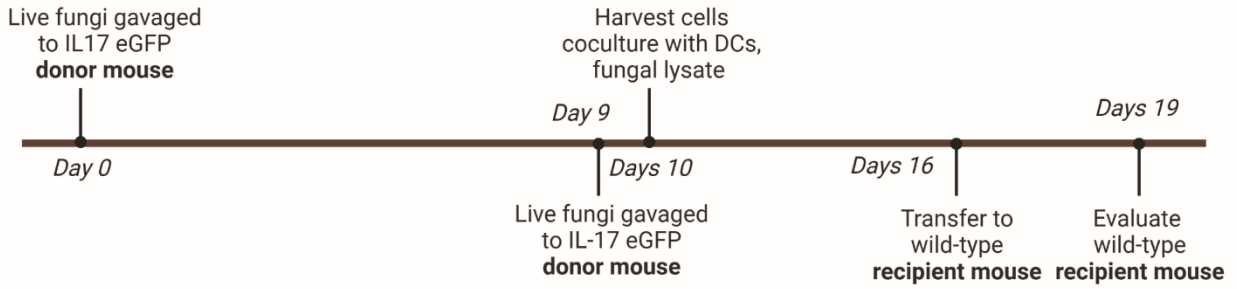

B

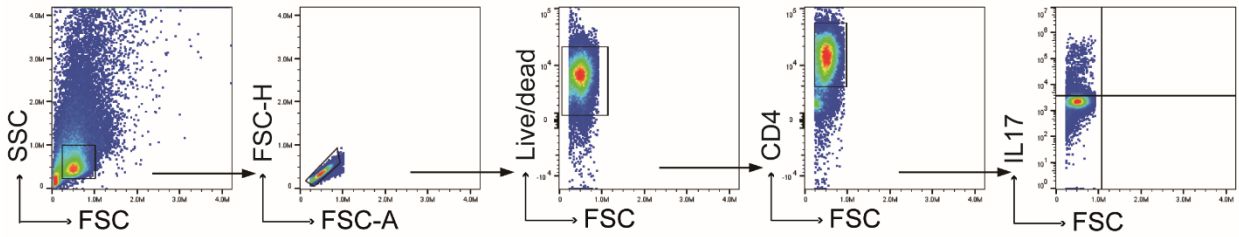

C

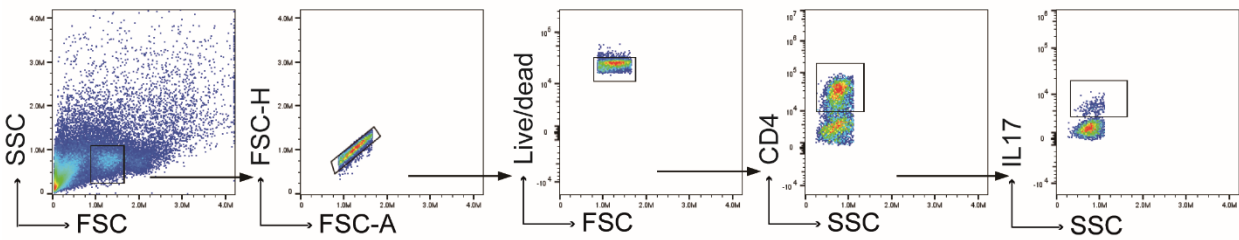

## Supplementary Figure 7

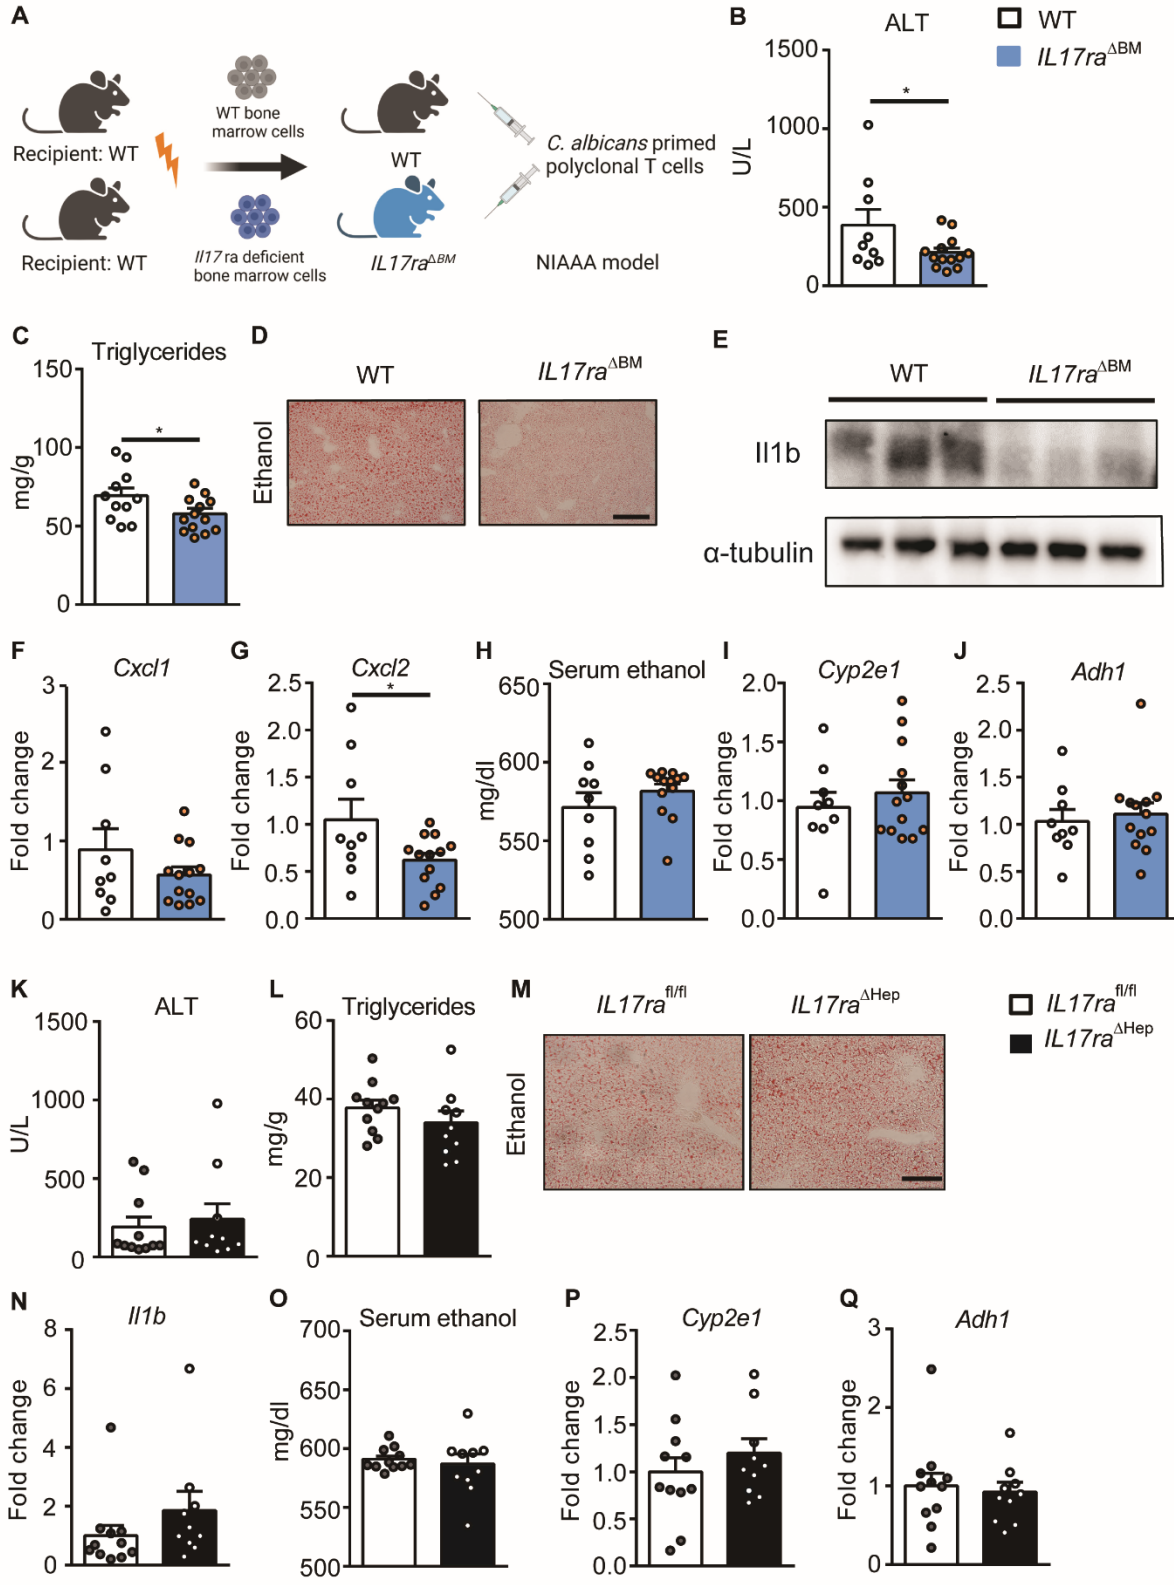

## 119 Reference

120

- 121 1. Zhang, J., Hung, G.C., Nagamine, K., Li, B., Tsai, S., and Lo, S.C. (2016).  
122 Development of *Candida*-Specific Real-Time PCR Assays for the Detection and  
123 Identification of Eight Medically Important *Candida* Species. *Microbiol.*  
124 *Insights* 9, 21-28. <https://doi.org/10.4137/mbi.S38517>.

125
